# Supplementary material
Source: Springer Nature journal article supplement (https://www.springermedizin.de/resource/supplementary/12960_2004_34_MOESM1_ESM.pdf/9570276)

# Number of deliveries at each facility

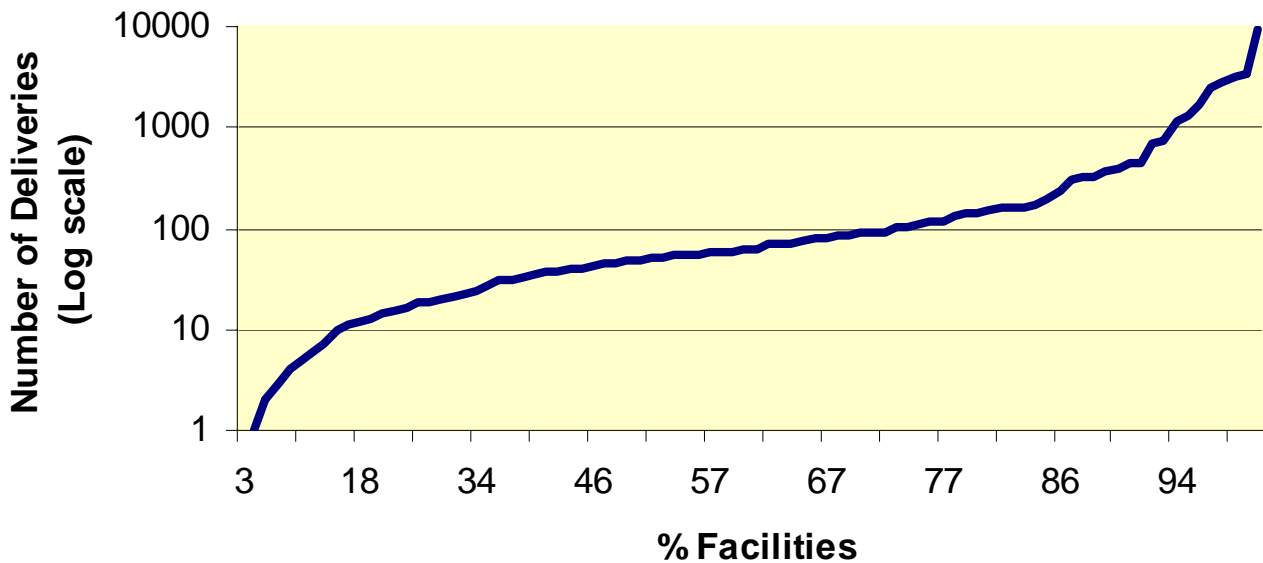

Supplement: MOESM1 [file 9570276]
